# Supplementary material for: Characteristics of Buffalo Farming Systems in Turkey Based on a Multivariate Aggregation of Indicators: A Survey Study
Source: MDPI journal article supplement (doi:10.3390/ani12213056), 2022-11-07
Supplement: s1 [file s1]

**Table S1.** Equations and references that were used to calculate the indicators.

| Indicator                       | Calculation                                                                                                                                                                        | References |
|---------------------------------|------------------------------------------------------------------------------------------------------------------------------------------------------------------------------------|------------|
| Herd Health Information         |                                                                                                                                                                                    |            |
| Culling rate                    | Number of female buffaloes leaving the herd / Total number of female buffaloes                                                                                                     | [61]       |
| Economic Information            |                                                                                                                                                                                    |            |
| Gross production value          | Dairy income + live animal selling income + subsidies + productive asset value increase                                                                                            | [62]       |
| Dairy income                    | Income generated from selling milk + yoghurt + kaymak. The calculation was performed as production quantity x corresponding price.                                                 | [62]       |
| Productive asset value increase | [Herd value at the end of the production year + sold live animal value + slaughtered animal value] – [Herd value in the beginning of the production year + purchased animal value] | [62]       |
| Gross profit                    | Gross production value – variable costs                                                                                                                                            | [62]       |
| Variable costs                  | Feed cost + temporary labor cost + health cost + electricity and water cost + annual loan interest                                                                                 | [62]       |
| Annual work unit                | The annual work unit of a worker was accepted as 1800 hours / year.                                                                                                                | [63]       |

**Table S2.** General characteristics of the farms corresponding to their location.

| Attributes                          | ISTANBUL |                    | KOCAELI |                    | BALIKESIR |                    |
|-------------------------------------|----------|--------------------|---------|--------------------|-----------|--------------------|
|                                     | N        | Relative Frequency | N       | Relative Frequency | N         | Relative Frequency |
| Grazing Information                 |          |                    |         |                    |           |                    |
| Own land grazing                    | 1        | 4.0                | 16      | 94.1               |           |                    |
| Meadow grazing                      | 14       | 56.0               | 1       | 5.9                | 10        | 100.               |
| Forest grazing                      | 3        | 12.0               |         |                    |           |                    |
| Mixed Grazing (Meadow + Forest)     | 7        | 28.0               |         |                    |           |                    |
| Animal Nutrition information-Summer |          |                    |         |                    |           |                    |
| Concentrate suppliers               | 23       | 92.0               | 10      | 58.8               | 7         | 70.0               |
| Wheat suppliers                     | 7        | 28.0               | 1       | 5.9                | 0         | 0.0                |
| Wheat shorts suppliers              | 7        | 28.0               | 0       | 0.0                | 0         | 0.0                |
| Wheat bran suppliers                | 3        | 12.0               | 2       | 11.8               | 10        | 100.0              |
| Barley suppliers                    | 14       | 56.0               | 3       | 17.6               | 7         | 70.0               |
| Beet pulp suppliers                 | 1        | 4.0                | 0       | 0.0                | 0         | 0.0                |
| Red dog suppliers                   | 16       | 64.0               | 0       | 0.0                | 0         | 0.0                |
| Cotton seed suppliers               | 0        | 0.0                | 0       | 0.0                | 7         | 70.0               |

|                                     |    |       |    |       |    |       |
|-------------------------------------|----|-------|----|-------|----|-------|
| Straw (barley or wheat) suppliers   | 22 | 88.0  | 9  | 52.9  | 8  | 80.0  |
| Alfalfa hay suppliers               | 17 | 68.0  | 11 | 64.7  | 9  | 90.0  |
| Corn silage suppliers               | 5  | 20.0  | 12 | 70.6  | 8  | 80.0  |
| Animal Nutrition information-Winter |    |       |    |       |    |       |
| Concentrate suppliers               | 23 | 92.0  | 13 | 76.5  | 6  | 60.0  |
| Wheat suppliers                     | 4  | 16.0  | 4  | 23.5  | 0  | 0.0   |
| Wheat shorts suppliers              | 12 | 48.0  | 0  | 0.0   | 0  | 0.0   |
| Wheat bran suppliers                | 1  | 4.0   | 4  | 23.5  | 10 | 100.0 |
| Barley suppliers                    | 14 | 56.0  | 10 | 58.8  | 4  | 40.0  |
| Beet pulp suppliers                 | 3  | 12.0  | 1  | 5.9   | 0  | 0.0   |
| Red dog suppliers                   | 16 | 64.0  | 0  | 0.0   | 0  | 0.0   |
| Cotton seed suppliers               | 0  | 0.0   | 0  | 0.0   | 4  | 40.0  |
| Straw (Barley or wheat) suppliers   | 25 | 100.0 | 15 | 88.2  | 7  | 70.0  |
| Alfalfa hay suppliers               | 22 | 88.0  | 14 | 82.4  | 9  |       |
| Corn silage suppliers               | 11 | 44.0  | 16 | 94.1  | 9  |       |
| Breed information                   |    |       |    |       |    |       |
| Anatolian Buffalo                   | 25 | 100.0 | 17 | 100.0 | 10 | 100.0 |
| Milking Information                 |    |       |    |       |    |       |
| Milking technique                   |    |       |    |       |    |       |
| Automatic milking                   | 14 | 56.0  | 11 | 64.7  | 5  | 50.0  |
| Hand milking                        | 11 | 44.0  | 6  | 35.3  | 5  | 50.0  |
| Milking frequency                   |    |       |    |       |    |       |
| Twice a day                         | 25 | 100.0 | 17 | 100.0 | 10 | 100.0 |
| Reproductive information            |    |       |    |       |    |       |
| Insemination technique              |    |       |    |       |    |       |
| Natural insemination                | 25 | 100.0 | 17 | 100.0 | 10 | 100.0 |
| Health Information                  |    |       |    |       |    |       |
| Calves Diarrhoea                    | 3  | 12.0  | 2  | 11.8  | 2  | 20.0  |
| Mastitis                            | 4  | 16.0  | 1  | 5.9   | 0  | 0.0   |
| No case report                      | 18 | 72.0  | 14 | 82.3  | 8  | 80.0  |
| Farms reported abortion             |    |       |    |       |    |       |
| Yes                                 | 10 | 40.0  | 9  | 52.9  | 4  | 40.0  |

**Table S3.** Percentage of farms with 0 values corresponds to each indicator.

| Indicators                                                           | Number | Relative Frequency |
|----------------------------------------------------------------------|--------|--------------------|
| <b>Land use information</b>                                          |        |                    |
| Land used for grain production, ha                                   | 21     | 40                 |
| Land used for roughage production, ha                                | 8      | 15                 |
| Land used for roughage and grain production per breeding buffalo, ha | 6      | 21                 |
| <b>Herd information</b>                                              |        |                    |
| Breeding buffalo / Buffalo bull                                      | 3      | 6                  |
| <b>Animal nutrition information</b>                                  |        |                    |
| Concentrate-to-roughage ratio in spring-summer                       | 11     | 21                 |
| Silage in diet, winter, %                                            | 16     | 31                 |
| Silage in diet, summer, %                                            | 26     | 50                 |
| <b>Herd health information</b>                                       |        |                    |
| Culling rate                                                         | 19     | 37                 |
| <b>Economic performance information</b>                              |        |                    |
| Milk income, US\$                                                    | 9      | 17                 |
| Yogurt income, US\$                                                  | 38     | 73                 |
| Milk price per kg, US\$                                              | 9      | 17                 |
| Yogurt price per kg, US\$                                            | 38     | 73                 |
| Kaymak price per kg, US\$                                            | 44     | 85                 |
| Purchased feed cost / Total feed cost                                | 2      | 4                  |
| Fattening calves' income / Dairy income, %                           | 30     | 58                 |
| <b>Labor information</b>                                             |        |                    |
| Family labour / Total labour, AWU                                    | 7      | 13                 |
| Paid labour / Total labour, AWU                                      | 8      | 58                 |

## Technical and Economic Analysis of the Buffalo Farms in Marmara Region

Farm No :

Date: ...../...../.....

Time:

Season: (1) Fall-winter

(2) Spring-summer

Province:

Farmer's NAME:

Phone number:

### **A. Farmer information:**

**A1.** Age: ..... and Gender: (male) (female)

**A2.** Number of households: (1) (2) (3) (4) (5) (6) (other .....)

**A3.** Experience in buffalo husbandry: ..... (month / year)

**A4.** Education status: (...) Literate, (...) Primary school, (...) Secondary school, (...) High school, (...) Vocational school, (...) University, (...) Master's degree-PhD, (...) Illiterate

**A5.** Monthly household income level except buffalo husbandry (₺): .....

**A6.** Is the farm property belonging to you? (...) yes, (...) no

If rent, how much is the monthly rent?.....

### **B. Land use:**

**B1.** Agricultural land (ha):.....

**B1a.** Cultivated pasture land (ha):.....

**B1b.** Cultivated roughage production land (ha):....

**B1c.** Cultivated grain production land (ha):.....

**B2.** Natural pasture land (ha):.....

**B2a.** Scrub land (ha):.....

**B2b.** Meadow land (ha):.....

**B2c.** Forest land(ha):.....

**B3.** Farm area (ha):.....

### **C. Herd structure:**

**C1. Breeds of farming buffaloes:**

|                                          |                                         |                                                |
|------------------------------------------|-----------------------------------------|------------------------------------------------|
| i) ..... number of female Anatolian Buf. | ii) ..... number of female Italian Buf. | iii) ..... . number of cross breed female Buf. |
| i) ..... number of male Anatolian Buf.   | ii) ..... number of male Italian Buf.   | iii)..... number of cross breed male Buf.      |

**C2.** Herd size: ..... number of breeding buffaloes (all breeds); ..... number of buffaloes giving first birth; ..... number of buffaloes giving 2 and more birth

**C3.** Number of buffalo calves: ..... number of female buffalo calves ; ..... number of male buffalo calves

Additional notes:

**D. Animal nutrition and pasture use:**

| A: only barn; M: only pasture; X: pasture+barn | JAN | FEB | MAR | APR | MAY | JUN | JUL | AUG | SEP | OCT | NOV | DEC |
|------------------------------------------------|-----|-----|-----|-----|-----|-----|-----|-----|-----|-----|-----|-----|
| <b>D1.</b> Female breeding herd:               |     |     |     |     |     |     |     |     |     |     |     |     |
| <b>D2.</b> Male buffalo calves:                |     |     |     |     |     |     |     |     |     |     |     |     |
| <b>D3.</b> Female buffalo calves:              |     |     |     |     |     |     |     |     |     |     |     |     |
| <b>D4.</b> Buffalo bull:                       |     |     |     |     |     |     |     |     |     |     |     |     |

**D5a.** What is the amount of feed given to animals during the corresponding period?

|                   | LACTATING BUFFALO (N): | DRY BUFFALO (N): | YOUNG BUFFALO(N): | BUFFALO BULL (N): |
|-------------------|------------------------|------------------|-------------------|-------------------|
| CONCENTRATE FEED: |                        |                  |                   |                   |
| FATTENING FEED:   |                        |                  |                   |                   |
| BARLEY:           |                        |                  |                   |                   |
| WHEAT:            |                        |                  |                   |                   |
| WHEAT SHORT:      |                        |                  |                   |                   |
| WHEAT BRAN:       |                        |                  |                   |                   |
| RED DOG:          |                        |                  |                   |                   |
| COTTON SEED:      |                        |                  |                   |                   |
| CORN:             |                        |                  |                   |                   |
| BEER PULP         |                        |                  |                   |                   |
| <b>ROUGHAGE</b>   |                        |                  |                   |                   |
| ALFALFA-HAY       |                        |                  |                   |                   |
| STRAW:            |                        |                  |                   |                   |
| SILAGE:           |                        |                  |                   |                   |

**D7.** Total amount of roughage offer (kg):.....

**D8.** Total amount of concentrate offer (kg):.....

**D9a.** Pasture enter and return hours in winter season .....- .....

**D9b.** Pasture enter and return hours in spring season: .....-.....

**D9c.** Pasture enter and return hours in summer season:.....-.....

**D9d.** Pasture enter and return hours in fall season: .....-.....

**D10.** Weaning age of buffalo calves (day): .....

Additional notes:

**E. Health, breeding, selection ve debugging information:**

**E1.** Culling rate: .....

**E2.** Reported diseases:.....

**E3a.** Have you experienced abortion this year so far? (...) yes, (...) no

**E3b.** Which gestation period has abortion occurred? .....

**E4.** Duration of use in breeding (year): buffalo bulls: ....., female buffaloes: .....

**E5.** Age of first use in breeding(month): female breeding buffaloes: ....., male breeding buffaloes: .....

**E6a.** Number of dead calves:.....

**E6b.** Number of dead buffalo:.....

Additional notes:

**F. Animal production**

|                              |     |     |     |     |     |     |     |     |     |     |     |     |
|------------------------------|-----|-----|-----|-----|-----|-----|-----|-----|-----|-----|-----|-----|
| S: Start; F: Finish          | Jan | Feb | Mar | Apr | May | Jun | Jul | Aug | Sep | Oct | Nov | Dec |
| <b>Lactating buffalo (N)</b> |     |     |     |     |     |     |     |     |     |     |     |     |
| <b>Produced milk (L)</b>     |     |     |     |     |     |     |     |     |     |     |     |     |

**F2. Milking technique:** (.....) by hand, (.....) by machine, Other: .....

**F3. Daily milking time:** (...) Only morning, (...) Only evening, (...) Morning + Evening, (...) Other.....

**F4. Milker:** (...) Shepherd, (...) Another milker, (...) Man in family, (...) Woman in family, (...) Other.....

**F5. Days in milk:** .....

Additional notes:

**G. Economic performance:**

**G1.** Which enterprise your feed is being purchased?.....

| <b>BUFFALO MILK PRODUCTION COSTS</b>                                 |                                    |
|----------------------------------------------------------------------|------------------------------------|
| <b>Cost elements</b>                                                 | <b>Purchase or production cost</b> |
| Concentrate                                                          |                                    |
| Fattening feed                                                       |                                    |
| Barley                                                               |                                    |
| Wheat                                                                |                                    |
| Wheat short                                                          |                                    |
| Wheat bran                                                           |                                    |
| Red dog                                                              |                                    |
| Cotton seed                                                          |                                    |
| Corn                                                                 |                                    |
| Beet pulp                                                            |                                    |
| Alfalfa hay                                                          |                                    |
| Straw                                                                |                                    |
| Silage                                                               |                                    |
| Cost of milk given to the calves                                     |                                    |
| Breeding female animal cost                                          |                                    |
| Breeding male animal cost                                            |                                    |
| Temporary labour cost                                                |                                    |
| Temporary labour duration (month):                                   |                                    |
| Water and energy cost                                                |                                    |
| Health cost (Veterinary, vaccine, medicine, artificial insemination) |                                    |
| Bedding cost                                                         |                                    |
| Loan interest (if any)                                               |                                    |
| Other costs                                                          |                                    |

Additional notes:

| <b>YOGHURT / KAYMAK PRODUCTION COSTS</b> |                        |
|------------------------------------------|------------------------|
| <b>Cost elements:</b>                    | <b>Costs (TL/year)</b> |
| Cow milk                                 |                        |
| Labour                                   |                        |
| Energy (Electricity or gas)              |                        |
| Yoghurt/Kaymak pot                       |                        |
| Water                                    |                        |

Used buffalo milk amount for producing 1 kg yoghurt/kaymak:.....

Used cow milk amount for use producing 1 kg yoghurt:/kaymak:.....

**G2. Market supply situations of income elements**

| Product       | Amount of prod. | Used in family | Amount of sold | Price (TL/kg) |
|---------------|-----------------|----------------|----------------|---------------|
| Milk (kg)     |                 |                |                |               |
| Manure (kg)   |                 |                |                |               |
| Kaymak (kg)   |                 |                |                |               |
| Yoghurt (kg)  |                 |                |                |               |
| Livestock (N) |                 |                |                |               |

**G3. Where/Who do you sell the animal products, what percentage?** (... % Union, (... % Cooperative, (... % Dairy company, (... % Regional dairy, (... % Farmer market, (... % other

**G4a. Do you benefit from the livestock supports?** (...) yes, (...) no

**G4b. What supports do you obtain?** (...) 4 months and above calve support, (...) Breed registry, (...) milk support, (...) cultivated feed crops, (...) National breeding buffalo project<sup>1</sup>, (...) Breeding buffalo calve support.

**G5. Financial values of animals at the beginning and end of the year**

|                                          | January 2018 |       | Between January 2018 and December 2018 |       |        |       |        |       | December 2018 |       |
|------------------------------------------|--------------|-------|----------------------------------------|-------|--------|-------|--------|-------|---------------|-------|
|                                          | Number       | Price | Purchased                              |       | Sold   |       | Dead   |       | Number        | Price |
|                                          |              |       | Number                                 | Price | Number | Price | Number | Price |               |       |
| Female buffalo                           |              |       |                                        |       |        |       |        |       |               |       |
| Buffalo bull                             |              |       |                                        |       |        |       |        |       |               |       |
| Male buffalo calve (0-6 month)           |              |       |                                        |       |        |       |        |       |               |       |
| Female buffalo calve (0-6 month)         |              |       |                                        |       |        |       |        |       |               |       |
| Female breeding buffalo (6 month- 3 age) |              |       |                                        |       |        |       |        |       |               |       |
| Male breeding buffalo (6 month- 3 age)   |              |       |                                        |       |        |       |        |       |               |       |

Additional notes:

**H. Labour:**

**H1.** How many members of your family actively attend to buffalo husbandry? (...) 1, ( ) 2, ( ) 3, (...) 4, (...) 5, (...) more than 5

**H2a.** How many hours do a family member work per day? .....

**H2b.** How many days do a family member work per week?.....

**H3a.** Do you use paid labour? (...) yes, (...) no



**H3b.** What is the number of paid labours? .....

**H3c.** What is the monthly cost for paid labour?

**H3d.** How many hours does your labour work daily? From..., until.....

**H3e.** How many days does your labour work weekly?.....

**H4a.** Number of paid labour younger than 40 years old.....

**H4b.** Number of family members younger than 40 years old and actively attending to buffalo husbandry:

**I. Investments in buildings and equipment:**

| Item                       | Yes (1), No (0) |
|----------------------------|-----------------|
| Milking unit               |                 |
| Milk cooling tank          |                 |
| Generator                  |                 |
| Feed crushing unit         |                 |
| Feed mixing unit           |                 |
| Buffalo barn               |                 |
| Courtyard                  |                 |
| Concentrate forage storage |                 |
| Roughage storage           |                 |
| Worker office/lodging      |                 |
| <b>Total score</b>         |                 |

**J. Farmer profile:**

**J1.** Did you attend a training on animal husbandry? (...) yes, (...) no

If you attend, duration(day): .....

**J2a.** Do you receive a technical advice? (...) yes, (...) no

**J2b.** If you are receiving, please indicate the field.

| Field                   | Yes (1), No (0) |
|-------------------------|-----------------|
| Health                  |                 |
| Reproduction            |                 |
| Animal nutrition        |                 |
| Pasture-cultivated land |                 |
| <b>Total score</b>      |                 |

**J3a.** Are you a member of a cooperative, union or association related to animal husbandry?

(...) yes, (...) no

**J3b.** If you are a member, please indicate which cooperative, union or association is it?.....
